# Supplementary material for: A High-Throughput DNA Sequence Aligner for Microbial Ecology Studies
Source: PubMed Central journal article supplement (PMC2788221; doi:10.1371/journal.pone.0008230), 2009-12-14
Supplement: pone.0008230.s001.pdf [file pone.0008230.s001.pdf]

**Table S1. Comparison of search methods when using various regions extracted from candidate sequences and full-length template sequences.**

| Region | Method      | Speed (seqs/s) | % Correct template | % Δsimilarity (sd) <sup>a</sup> |
|--------|-------------|----------------|--------------------|---------------------------------|
| V19    | 5-mers      | 37             | 54.9               | 8.3 (10.0)                      |
|        | 6-mers      | 34             | 72.0               | 5.0 (8.5)                       |
|        | 7-mers      | 41             | 74.6               | 4.5 (8.2)                       |
|        | 8-mers      | 49             | 74.6               | 4.5 (8.2)                       |
|        | 9-mers      | 52             | 74.1               | 4.6 (8.3)                       |
|        | 10-mers     | 43             | 73.4               | 4.7 (8.4)                       |
|        | Suffix tree | 1.9            | 62.3               | 7.2 (9.9)                       |
|        | blastn      | 0.7            | 63.4               | 6.8 (9.6)                       |
| V14    | 5-mers      | 54             | 55.3               | 8.9 (10.7)                      |
|        | 6-mers      | 65             | 71.9               | 5.3 (9.1)                       |
|        | 7-mers      | 90             | 73.5               | 5.0 (8.9)                       |
|        | 8-mers      | 107            | 73.6               | 5.0 (8.9)                       |
|        | 9-mers      | 90             | 73.3               | 5.0 (8.9)                       |
|        | 10-mers     | 81             | 72.9               | 5.1 (8.9)                       |
|        | Suffix tree | 3              | 55.2               | 9.5 (11.4)                      |
|        | blastn      | 2              | 60.6               | 8.3 (11.1)                      |
| V12    | 5-mers      | 97             | 47.7               | 12.7 (13.2)                     |
|        | 6-mers      | 146            | 64.2               | 8.3 (12.0)                      |
|        | 7-mers      | 211            | 67.3               | 7.6 (11.7)                      |
|        | 8-mers      | 243            | 67.6               | 7.5 (11.6)                      |
|        | 9-mers      | 210            | 67.6               | 7.5 (11.6)                      |
|        | 10-mers     | 103            | 67.4               | 7.5 (11.6)                      |
|        | Suffix tree | 4              | 41.1               | 15.4 (14.2)                     |
|        | blastn      | 7              | 48.0               | 13.5 (14.2)                     |
| V2     | 5-mers      | 118            | 50.6               | 11.7 (12.8)                     |
|        | 6-mers      | 180            | 68.3               | 7.2 (11.2)                      |
|        | 7-mers      | 280            | 72.6               | 6.1 (10.6)                      |
|        | 8-mers      | 225            | 72.7               | 6.1 (10.5)                      |
|        | 9-mers      | 202            | 72.4               | 6.1 (10.5)                      |
|        | 10-mers     | 104            | 71.7               | 6.3 (10.6)                      |
|        | Suffix tree | 5.5            | 39.4               | 15.3 (13.6)                     |
|        | blastn      | 8.8            | 49.0               | 13.0 (13.8)                     |
| V23    | 5-mers      | 77             | 52.4               | 10.2 (11.6)                     |
|        | 6-mers      | 109            | 70.7               | 6.1 (10.1)                      |
|        | 7-mers      | 159            | 73.1               | 5.5 (9.7)                       |
|        | 8-mers      | 192            | 73.4               | 5.4 (9.6)                       |
|        | 9-mers      | 178            | 73.8               | 5.3 (9.5)                       |
|        | 10-mers     | 95             | 73.3               | 5.4 (9.6)                       |
|        | Suffix tree | 4              | 47.2               | 12.1 (12.5)                     |
|        | blastn      | 3              | 55.7               | 10.3 (12.5)                     |
| V3     | 5-mers      | 174            | 46.8               | 11.6 (11.9)                     |
|        | 6-mers      | 277            | 70.0               | 6.3 (10.3)                      |
|        | 7-mers      | 428            | 74.0               | 5.5 (9.8)                       |
|        | 8-mers      | 455            | 75.8               | 5.1 (9.6)                       |
|        | 9-mers      | 323            | 76.5               | 4.9 (9.5)                       |
|        | 10-mers     | 122            | 76.7               | 4.9 (9.5)                       |
|        | Suffix tree | 8              | 26.6               | 17.0 (12.0)                     |
|        | blastn      | 14             | 32.8               | 15.7 (12.9)                     |
| V4     | 5-mers      | 133            | 50.9               | 9.2 (10.1)                      |
|        | 6-mers      | 201            | 72.4               | 4.8 (8.2)                       |
|        | 7-mers      | 315            | 75.1               | 4.2 (7.7)                       |
|        | 8-mers      | 388            | 77.2               | 3.8 (7.4)                       |
|        | 9-mers      | 309            | 77.4               | 3.8 (7.4)                       |
|        | 10-mers     | 130            | 77.4               | 3.7 (7.3)                       |
|        | Suffix tree | 5.8            | 33.3               | 13.9 (10.8)                     |
|        | blastn      | 1.1            | 40.7               | 12.7 (11.9)                     |
| V6     | 5-mers      | 449            | 42.8               | 26.8 (24.6)                     |
|        | 6-mers      | 792            | 63.8               | 15.8 (21.8)                     |
|        | 7-mers      | 1400           | 68.4               | 13.6 (20.8)                     |
|        | 8-mers      | 1490           | 70.3               | 12.7 (20.3)                     |
|        | 9-mers      | 644            | 70.6               | 12.5 (20.2)                     |

|     |             |     |      |             |
|-----|-------------|-----|------|-------------|
|     | 10-mers     | 170 | 70.4 | 12.6 (20.2) |
|     | Suffix tree | 12  | 25.1 | 36.9 (23.4) |
|     | blastn      | 31  | 17.1 | 54.5 (29.1) |
| V89 | 5-mers      | 79  | 51.6 | 9.1 (10.2)  |
|     | 6-mers      | 104 | 70.7 | 5.2 (8.7)   |
|     | 7-mers      | 142 | 75.0 | 4.3 (8.1)   |
|     | 8-mers      | 168 | 76.4 | 4.1 (7.9)   |
|     | 9-mers      | 163 | 76.6 | 4.0 (7.8)   |
|     | 10-mers     | 102 | 76.4 | 4.0 (7.8)   |
|     | Suffix tree | 5.4 | 40.8 | 11.7 (10.6) |
|     | blastn      | 2.4 | 47.8 | 10.5 (10.8) |
| V9  | 5-mers      | 135 | 47.0 | 9.9 (10.2)  |
|     | 6-mers      | 195 | 70.3 | 5.3 (8.7)   |
|     | 7-mers      | 263 | 74.8 | 4.4 (8.1)   |
|     | 8-mers      | 278 | 76.6 | 4.1 (7.8)   |
|     | 9-mers      | 239 | 77.0 | 3.9 (7.7)   |
|     | 10-mers     | 117 | 77.0 | 3.9 (7.7)   |
|     | Suffix tree | 8.8 | 28.1 | 14.1 (10.1) |
|     | blastn      | 3.4 | 33.1 | 13.3 (10.5) |

- a The average percentage difference in similarity between the correct template and the actual template returned by the search method for each candidate sequence. Smaller values indicate that more similar sequences were identified. Values in parentheses represent the standard deviation.
