# Supplementary material for: A High-Throughput DNA Sequence Aligner for Microbial Ecology Studies
Source: PubMed Central journal article supplement (PMC2788221; doi:10.1371/journal.pone.0008230), 2009-12-14
Supplement: pone.0008230.s002.pdf [file pone.0008230.s002.pdf]

**Table S2. Comparison of search methods when using various regions extracted from candidate sequences and region-specific template sequences.**

| Region | Method      | Speed (seqs/s) | % Correct template | % $\Delta$ similarity (sd) <sup>a</sup> |
|--------|-------------|----------------|--------------------|-----------------------------------------|
| V14    | 5-mers      | 70             | 66.6               | 6.5 (9.8)                               |
|        | 6-mers      | 81             | 73.7               | 5.0 (8.9)                               |
|        | 7-mers      | 104            | 74.2               | 4.8 (8.8)                               |
|        | 8-mers      | 121            | 74.0               | 4.9 (8.8)                               |
|        | 9-mers      | 122            | 73.5               | 5.0 (8.9)                               |
|        | 10-mers     | 85             | 73.0               | 5.1 (8.9)                               |
|        | Suffix tree | 4              | 55.7               | 9.4 (11.4)                              |
|        | blastn      | 2              | 60.6               | 8.3 (11.1)                              |
| V12    | 5-mers      | 136            | 66.5               | 7.7 (11.6)                              |
|        | 6-mers      | 178            | 69.6               | 7.0(11.3)                               |
|        | 7-mers      | 216            | 69.1               | 7.1 (11.4)                              |
|        | 8-mers      | 211            | 68.5               | 7.2 (11.4)                              |
|        | 9-mers      | 244            | 67.9               | 7.4 (11.5)                              |
|        | 10-mers     | 128            | 67.6               | 7.4 (11.5)                              |
|        | Suffix tree | 7              | 42.9               | 15.0 (14.3)                             |
|        | blastn      | 8              | 48.0               | 13.5 (14.2)                             |
| V2     | 5-mers      | 196            | 68.1               | 7.3 (11.4)                              |
|        | 6-mers      | 281            | 73.7               | 5.9 (10.4)                              |
|        | 7-mers      | 372            | 74.3               | 5.7 (10.3)                              |
|        | 8-mers      | 430            | 73.6               | 5.8 (10.4)                              |
|        | 9-mers      | 353            | 72.5               | 6.1 (10.5)                              |
|        | 10-mers     | 144            | 71.8               | 6.3 (10.6)                              |
|        | Suffix tree | 8              | 40.7               | 15.0 (13.6)                             |
|        | blastn      | 9              | 49.0               | 13.0 (13.8)                             |
| V23    | 5-mers      | 127            | 72.4               | 5.7 (9.8)                               |
|        | 6-mers      | 161            | 75.9               | 4.9 (9.2)                               |
|        | 7-mers      | 201            | 75.2               | 5.0 (9.3)                               |
|        | 8-mers      | 226            | 74.6               | 5.1 (9.4)                               |
|        | 9-mers      | 206            | 74.0               | 5.3 (9.4)                               |
|        | 10-mers     | 113            | 73.4               | 5.4 (9.5)                               |
|        | Suffix tree | 6              | 48.3               | 11.9 (12.5)                             |
|        | blastn      | 3              | 55.7               | 10.3 (12.5)                             |
| V3     | 5-mers      | 321            | 78.8               | 4.5 (9.1)                               |
|        | 6-mers      | 434            | 78.8               | 4.4 (9.1)                               |
|        | 7-mers      | 512            | 78.5               | 4.5 (9.2)                               |
|        | 8-mers      | 523            | 78.0               | 4.6 (9.3)                               |
|        | 9-mers      | 366            | 77.5               | 4.7 (9.3)                               |
|        | 10-mers     | 138            | 77.0               | 4.8 (9.4)                               |
|        | Suffix tree | 17             | 28.6               | 16.6 (12.2)                             |
|        | blastn      | 18             | 32.8               | 15.7 (12.9)                             |
| V4     | 5-mers      | 268            | 79.4               | 3.5 (7.2)                               |
|        | 6-mers      | 351            | 81.1               | 3.2 (6.9)                               |
|        | 7-mers      | 437            | 80.0               | 3.3 (7.0)                               |
|        | 8-mers      | 501            | 79.2               | 3.4 (7.0)                               |
|        | 9-mers      | 399            | 78.6               | 3.5 (7.1)                               |
|        | 10-mers     | 153            | 77.6               | 3.7 (7.3)                               |
|        | Suffix tree | 13             | 34.9               | 13.6 (10.9)                             |
|        | blastn      | 13             | 40.7               | 12.7 (11.9)                             |
| V6     | 5-mers      | 1633           | 73.9               | 10.9 (19.1)                             |
|        | 6-mers      | 2140           | 73.7               | 11.1 (19.3)                             |
|        | 7-mers      | 2328           | 73.0               | 11.4 (19.5)                             |
|        | 8-mers      | 1648           | 72.2               | 11.8 (19.7)                             |
|        | 9-mers      | 584            | 71.6               | 12.1 (19.9)                             |
|        | 10-mers     | 147            | 70.9               | 12.4 (20.1)                             |
|        | Suffix tree | 28             | 27.0               | 36.1 (23.9)                             |
|        | blastn      | 50             | 17.1               | 54.4 (29.1)                             |
| V89    | 5-mers      | 117            | 74.0               | 4.6 (8.3)                               |
|        | 6-mers      | 136            | 77.6               | 3.9 (7.8)                               |
|        | 7-mers      | 160            | 78.2               | 3.7 (7.6)                               |
|        | 8-mers      | 175            | 77.9               | 3.8 (7.6)                               |
|        | 9-mers      | 161            | 77.4               | 3.8 (7.7)                               |

|    |             |     |      |             |
|----|-------------|-----|------|-------------|
|    | 10-mers     | 96  | 76.8 | 3.9 (7.7)   |
|    | Suffix tree | 8   | 41.6 | 11.5 (10.6) |
|    | blastn      | 3   | 47.8 | 10.5 (10.8) |
| V9 | 5-mers      | 235 | 78.9 | 3.7 (7.6)   |
|    | 6-mers      | 274 | 79.8 | 3.5 (7.4)   |
|    | 7-mers      | 306 | 79.3 | 3.5 (7.4)   |
|    | 8-mers      | 311 | 78.9 | 3.6 (7.4)   |
|    | 9-mers      | 231 | 78.1 | 3.7 (7.6)   |
|    | 10-mers     | 100 | 77.5 | 3.8 (7.6)   |
|    | Suffix tree | 14  | 29.5 | 13.9 (10.2) |
|    | blastn      | 4   | 33.1 | 13.3 (10.5) |

- a The average percentage difference in similarity between the correct template and the actual template returned by the search method for each candidate sequence. Smaller values indicate that more similar sequences were identified. Values in parentheses represent the standard deviation.
