# Supplementary material for: A High-Throughput DNA Sequence Aligner for Microbial Ecology Studies
Source: PubMed Central journal article supplement (PMC2788221; doi:10.1371/journal.pone.0008230), 2009-12-14
Supplement: pone.0008230.s003.pdf [file pone.0008230.s003.pdf]

**Table S3. Summary of alignment improvement for various regions extracted from candidate sequences using the blastn, Gotoh, or Needleman-Wunsch pairwise alignment algorithms when the best full-length template was selected for each candidate sequence.**

| Region | Alignment method | Speed (seq/s) | Gap opening | Gap extension | % Δsimilarity (sd) <sup>a</sup> |
|--------|------------------|---------------|-------------|---------------|---------------------------------|
| V19    | blastn           | 10-12         | 5           | 2             | 0.42 (0.9)                      |
|        |                  |               | 4           | 2             | 0.41 (0.9)                      |
|        |                  |               | 3           | 2             | 0.42 (0.9)                      |
|        |                  |               | 2           | 2             | 0.41 (0.8)                      |
|        |                  |               | 1           | 2             | 0.43 (0.8)                      |
|        |                  |               | 4           | 1             | 0.34 (0.7)                      |
|        |                  |               | 3           | 1             | 0.36 (0.7)                      |
|        | Gotoh            | 15-17         | 5           | 2             | 0.23 (0.4)                      |
|        |                  |               | 4           | 2             | 0.24 (0.5)                      |
|        |                  |               | 3           | 2             | 0.27 (0.5)                      |
|        |                  |               | 2           | 2             | 0.29 (0.5)                      |
|        |                  |               | 1           | 2             | 0.34 (0.6)                      |
|        |                  |               | 4           | 1             | 0.25 (0.5)                      |
|        |                  |               | 3           | 1             | 0.29 (0.5)                      |
|        | Needleman-Wunsch | 21-24         | 5           | NA            | 0.27 (0.5)                      |
|        |                  |               | 4           | NA            | 0.30 (0.5)                      |
|        |                  |               | 3           | NA            | 0.34 (0.6)                      |
| 2      |                  |               | NA          | 0.42 (0.6)    |                                 |
| 1      |                  |               | NA          | 0.38 (0.6)    |                                 |
| V14    | blastn           | 10-11         | 5           | 2             | 0.42 (1.2)                      |
|        |                  |               | 4           | 2             | 0.41 (1.1)                      |
|        |                  |               | 3           | 2             | 0.42 (1.1)                      |
|        |                  |               | 2           | 2             | 0.40 (1.0)                      |
|        |                  |               | 1           | 2             | 0.42 (1.0)                      |
|        |                  |               | 4           | 1             | 0.31 (0.9)                      |
|        |                  |               | 3           | 1             | 0.34 (0.8)                      |
|        | Gotoh            | 12-13         | 5           | 2             | 0.22 (0.5)                      |
|        |                  |               | 4           | 2             | 0.23 (0.5)                      |
|        |                  |               | 3           | 2             | 0.26 (0.6)                      |
|        |                  |               | 2           | 2             | 0.28 (0.6)                      |
|        |                  |               | 1           | 2             | 0.35 (0.7)                      |
|        |                  |               | 4           | 1             | 0.24 (0.5)                      |
|        |                  |               | 3           | 1             | 0.28 (0.6)                      |
|        | Needleman-Wunsch | 16-18         | 5           | NA            | 0.16 (0.6)                      |
|        |                  |               | 4           | NA            | 0.30 (0.6)                      |
|        |                  |               | 3           | NA            | 0.35 (0.7)                      |
| 2      |                  |               | NA          | 0.44 (0.7)    |                                 |
| 1      |                  |               | NA          | 0.41 (0.7)    |                                 |
| V12    | blastn           | 11-13         | 5           | 2             | 0.63 (1.9)                      |
|        |                  |               | 4           | 2             | 0.62 (1.9)                      |
|        |                  |               | 3           | 2             | 0.64 (1.8)                      |
|        |                  |               | 2           | 2             | 0.63 (1.7)                      |
|        |                  |               | 1           | 2             | 0.66 (1.6)                      |
|        |                  |               | 4           | 1             | 0.50 (1.5)                      |
|        |                  |               | 3           | 1             | 0.57 (1.5)                      |
|        | Gotoh            | 36-37         | 5           | 2             | 0.36 (1.0)                      |
|        |                  |               | 4           | 2             | 0.37 (1.0)                      |
|        |                  |               | 3           | 2             | 0.43 (1.0)                      |
|        |                  |               | 2           | 2             | 0.46 (1.1)                      |
|        |                  |               | 1           | 2             | 0.56 (1.2)                      |
|        |                  |               | 4           | 1             | 0.38 (1.0)                      |
|        |                  | 3             | 1           | 0.46 (1.1)    |                                 |
|        |                  | 2             | 1           | 0.51 (1.1)    |                                 |

|     |                  |       |   |    |            |
|-----|------------------|-------|---|----|------------|
|     |                  |       | 1 | 1  | 0.65 (1.2) |
|     | Needleman-Wunsch | 40-46 | 5 | NA | 0.43 (1.1) |
|     |                  |       | 4 | NA | 0.49 (1.1) |
|     |                  |       | 3 | NA | 0.55 (1.2) |
|     |                  |       | 2 | NA | 0.66 (1.2) |
|     |                  | 10    | 1 | NA | 0.64 (1.2) |
| V2  | blastn           |       | 5 | 2  | 0.29 (1.3) |
|     |                  |       | 4 | 2  | 0.29 (1.2) |
|     |                  |       | 3 | 2  | 0.29 (1.1) |
|     |                  |       | 2 | 2  | 0.29 (1.0) |
|     |                  |       | 1 | 2  | 0.32 (1.0) |
|     |                  |       | 4 | 1  | 0.25 (0.9) |
|     |                  |       | 3 | 1  | 0.28 (1.0) |
|     |                  |       | 2 | 1  | 0.30 (1.0) |
|     | Gotoh            | 46-47 | 5 | 2  | 0.13 (0.6) |
|     |                  |       | 4 | 2  | 0.14 (0.6) |
|     |                  |       | 3 | 2  | 0.16 (0.6) |
|     |                  |       | 2 | 2  | 0.18 (0.7) |
|     |                  |       | 1 | 2  | 0.22 (0.7) |
|     |                  |       | 4 | 1  | 0.15 (0.6) |
|     |                  |       | 3 | 1  | 0.18 (0.7) |
|     |                  |       | 2 | 1  | 0.21 (0.7) |
|     |                  |       | 1 | 1  | 0.29 (0.8) |
|     | Needleman-Wunsch | 55-59 | 5 | NA | 0.16 (0.7) |
|     |                  |       | 4 | NA | 0.18 (0.7) |
|     |                  |       | 3 | NA | 0.21 (0.7) |
|     |                  |       | 2 | NA | 0.29 (0.8) |
|     |                  |       | 1 | NA | 0.29 (0.8) |
| V23 | blastn           | 10-11 | 5 | 2  | 0.29 (1.0) |
|     |                  |       | 4 | 2  | 0.28 (1.0) |
|     |                  |       | 3 | 2  | 0.28 (0.9) |
|     |                  |       | 2 | 2  | 0.28 (0.9) |
|     |                  |       | 1 | 2  | 0.31 (0.8) |
|     |                  |       | 4 | 1  | 0.23 (0.7) |
|     |                  |       | 3 | 1  | 0.25 (0.7) |
|     |                  |       | 2 | 1  | 0.28 (0.7) |
|     | Gotoh            | 36-37 | 5 | 2  | 0.15 (0.5) |
|     |                  |       | 4 | 2  | 0.15 (0.5) |
|     |                  |       | 3 | 2  | 0.17 (0.5) |
|     |                  |       | 2 | 2  | 0.19 (0.5) |
|     |                  |       | 1 | 2  | 0.23 (0.6) |
|     |                  |       | 4 | 1  | 0.16 (0.5) |
|     |                  |       | 3 | 1  | 0.19 (0.5) |
|     |                  |       | 2 | 1  | 0.22 (0.5) |
|     |                  |       | 1 | 1  | 0.30 (0.6) |
|     | Needleman-Wunsch | 44-49 | 5 | NA | 0.16 (0.6) |
|     |                  |       | 4 | NA | 0.18 (0.6) |
|     |                  |       | 3 | NA | 0.22 (0.6) |
|     |                  |       | 2 | NA | 0.30 (0.6) |
|     |                  |       | 1 | NA | 0.28 (0.7) |
| V3  | blastn           | 9-11  | 5 | 2  | 0.21 (1.3) |
|     |                  |       | 4 | 2  | 0.21 (1.3) |
|     |                  |       | 3 | 2  | 0.22 (1.3) |
|     |                  |       | 2 | 2  | 0.21 (1.2) |
|     |                  |       | 1 | 2  | 0.24 (1.2) |
|     |                  |       | 4 | 1  | 0.16 (1.0) |
|     |                  |       | 3 | 1  | 0.17 (0.9) |
|     |                  |       | 2 | 1  | 0.19 (0.9) |
|     | Gotoh            | 61-62 | 5 | 2  | 0.11 (0.5) |
|     |                  |       | 4 | 2  | 0.11 (0.5) |
|     |                  |       | 3 | 2  | 0.12 (0.5) |
|     |                  |       | 2 | 2  | 0.13 (0.6) |
|     |                  |       | 1 | 2  | 0.17 (0.6) |
|     |                  |       | 4 | 1  | 0.12 (0.5) |
|     |                  |       | 3 | 1  | 0.13 (0.6) |
|     |                  |       | 2 | 1  | 0.16 (0.6) |

|     |                  |       |   |    |            |
|-----|------------------|-------|---|----|------------|
|     |                  |       | 1 | 1  | 0.21 (0.6) |
|     | Needleman-Wunsch | 69-73 | 5 | NA | 0.09 (0.8) |
|     |                  |       | 4 | NA | 0.11 (0.7) |
|     |                  |       | 3 | NA | 0.15 (0.7) |
|     |                  |       | 2 | NA | 0.20 (0.7) |
|     |                  |       | 1 | NA | 0.17 (0.7) |
| V4  | blastn           | 11-13 | 5 | 2  | 0.10 (0.5) |
|     |                  |       | 4 | 2  | 0.10 (0.5) |
|     |                  |       | 3 | 2  | 0.10 (0.5) |
|     |                  |       | 2 | 2  | 0.10 (0.5) |
|     |                  |       | 1 | 2  | 0.11 (0.5) |
|     |                  |       | 4 | 1  | 0.09 (0.5) |
|     |                  |       | 3 | 1  | 0.10 (0.5) |
|     |                  |       | 2 | 1  | 0.11 (0.5) |
|     | Gotoh            | 46-47 | 5 | 2  | 0.04 (0.3) |
|     |                  |       | 4 | 2  | 0.04 (0.3) |
|     |                  |       | 3 | 2  | 0.04 (0.3) |
|     |                  |       | 2 | 2  | 0.05 (0.3) |
|     |                  |       | 1 | 2  | 0.06 (0.3) |
|     |                  |       | 4 | 1  | 0.04 (0.3) |
|     |                  |       | 3 | 1  | 0.05 (0.3) |
|     |                  |       | 2 | 1  | 0.06 (0.3) |
|     |                  |       | 1 | 1  | 0.12 (0.4) |
|     | Needleman-Wunsch | 55-56 | 5 | NA | 0.05 (0.3) |
|     |                  |       | 4 | NA | 0.05 (0.3) |
|     |                  |       | 3 | NA | 0.06 (0.3) |
|     |                  |       | 2 | NA | 0.12 (0.4) |
|     |                  |       | 1 | NA | 0.10 (0.4) |
| V6  | blastn           | 10-12 | 5 | 2  | -1.85 (14) |
|     |                  |       | 4 | 2  | -1.81 (14) |
|     |                  |       | 3 | 2  | -1.72 (14) |
|     |                  |       | 2 | 2  | -1.64 (14) |
|     |                  |       | 1 | 2  | -1.75 (14) |
|     |                  |       | 4 | 1  | -1.75 (14) |
|     |                  |       | 3 | 1  | -1.65 (14) |
|     |                  |       | 2 | 1  | -1.75 (14) |
|     | Gotoh            | 63-64 | 5 | 2  | 0.30 (1.9) |
|     |                  |       | 4 | 2  | 0.33 (1.8) |
|     |                  |       | 3 | 2  | 0.40 (1.8) |
|     |                  |       | 2 | 2  | 0.43 (1.8) |
|     |                  |       | 1 | 2  | 0.48 (1.8) |
|     |                  |       | 4 | 1  | 0.36 (1.7) |
|     |                  |       | 3 | 1  | 0.43 (1.7) |
|     |                  |       | 2 | 1  | 0.47 (1.7) |
|     |                  |       | 1 | 1  | 0.60 (1.9) |
|     | Needleman-Wunsch | 67-70 | 5 | NA | 0.39 (1.8) |
|     |                  |       | 4 | NA | 0.43 (1.8) |
|     |                  |       | 3 | NA | 0.48 (1.8) |
|     |                  |       | 2 | NA | 0.59 (1.9) |
|     |                  |       | 1 | NA | 0.63 (1.9) |
| V89 | blastn           | 10-11 | 5 | 2  | 0.24 (1.0) |
|     |                  |       | 4 | 2  | 0.24 (0.9) |
|     |                  |       | 3 | 2  | 0.25 (0.9) |
|     |                  |       | 2 | 2  | 0.25 (0.9) |
|     |                  |       | 1 | 2  | 0.25 (0.9) |
|     |                  |       | 4 | 1  | 0.22 (0.9) |
|     |                  |       | 3 | 1  | 0.23 (0.9) |
|     |                  |       | 2 | 1  | 0.23 (0.8) |
|     | Gotoh            | 35-36 | 5 | 2  | 0.15 (0.6) |
|     |                  |       | 4 | 2  | 0.15 (0.6) |
|     |                  |       | 3 | 2  | 0.17 (0.6) |
|     |                  |       | 2 | 2  | 0.17 (0.6) |
|     |                  |       | 1 | 2  | 0.19 (0.6) |
|     |                  |       | 4 | 1  | 0.15 (0.6) |
|     |                  |       | 3 | 1  | 0.17 (0.6) |
|     |                  |       | 2 | 1  | 0.18 (0.6) |

|    |                  |       |   |    |            |
|----|------------------|-------|---|----|------------|
|    |                  |       | 1 | 1  | 0.21 (0.6) |
|    | Needleman-Wunsch | 46-50 | 5 | NA | 0.17 (0.6) |
|    |                  |       | 4 | NA | 0.18 (0.6) |
|    |                  |       | 3 | NA | 0.19 (0.6) |
|    |                  |       | 2 | NA | 0.22 (0.7) |
|    |                  |       | 1 | NA | 0.19 (0.6) |
| V9 | blastn           | 10-11 | 5 | 2  | 0.26 (1.5) |
|    |                  |       | 4 | 2  | 0.26 (1.5) |
|    |                  |       | 3 | 2  | 0.27 (1.5) |
|    |                  |       | 2 | 2  | 0.26 (1.4) |
|    |                  |       | 1 | 2  | 0.26 (1.4) |
|    |                  |       | 4 | 1  | 0.23 (1.4) |
|    |                  |       | 3 | 1  | 0.24 (1.3) |
|    |                  |       | 2 | 1  | 0.24 (1.3) |
|    | Gotoh            | 52-55 | 5 | 2  | 0.12 (0.8) |
|    |                  |       | 4 | 2  | 0.13 (0.8) |
|    |                  |       | 3 | 2  | 0.15 (0.8) |
|    |                  |       | 2 | 2  | 0.16 (0.8) |
|    |                  |       | 1 | 2  | 0.18 (0.8) |
|    |                  |       | 4 | 1  | 0.13 (0.8) |
|    |                  |       | 3 | 1  | 0.16 (0.8) |
|    |                  |       | 2 | 1  | 0.16 (0.8) |
|    |                  |       | 1 | 1  | 0.18 (0.8) |
|    | Needleman-Wunsch | 64-65 | 5 | NA | 0.15 (0.8) |
|    |                  |       | 4 | NA | 0.17 (0.8) |
|    |                  |       | 3 | NA | 0.17 (0.8) |
|    |                  |       | 2 | NA | 0.19 (0.9) |
|    |                  |       | 1 | NA | 0.17 (0.8) |

- a The average percentage difference in similarity between the template sequence and the SILVA aligned candidate sequence and the difference in similarity between the template sequence and the candidate sequence aligned by the different implementations. Positive values indicate the candidate alignment is more similar to the template sequence and negative values are less similar. Values in parentheses indicate the standard deviation.
