# Supplementary material for: A High-Throughput DNA Sequence Aligner for Microbial Ecology Studies
Source: PubMed Central journal article supplement (PMC2788221; doi:10.1371/journal.pone.0008230), 2009-12-14
Supplement: pone.0008230.s004.pdf [file pone.0008230.s004.pdf]

**Table S4. Summary of alignment improvement for various regions extracted from candidate sequences using the blastn, Gotoh, or Needleman-Wunsch pairwise alignment algorithms when the best region-specific template was selected for each candidate sequence.**

| Region           | Alignment method | Speed (seq/s) | Gap opening | Gap extension | % $\Delta$ similarity (sd) <sup>a</sup> |
|------------------|------------------|---------------|-------------|---------------|-----------------------------------------|
| V14              | blastn           | 10            | 5           | 2             | 0.42 (1.1)                              |
|                  |                  |               | 4           | 2             | 0.41 (1.1)                              |
|                  |                  |               | 3           | 2             | 0.42 (1.1)                              |
|                  |                  |               | 2           | 2             | 0.40 (1.0)                              |
|                  |                  |               | 1           | 2             | 0.42 (1.0)                              |
|                  |                  |               | 4           | 1             | 0.31 (0.9)                              |
|                  |                  |               | 3           | 1             | 0.34 (0.8)                              |
|                  |                  |               | 2           | 1             | 0.37 (0.8)                              |
|                  | Gotoh            | 31            | 5           | 2             | 0.22 (0.5)                              |
|                  |                  |               | 4           | 2             | 0.23 (0.5)                              |
|                  |                  |               | 3           | 2             | 0.26 (0.6)                              |
|                  |                  |               | 2           | 2             | 0.28 (0.6)                              |
|                  |                  |               | 1           | 2             | 0.35 (0.7)                              |
|                  |                  |               | 4           | 1             | 0.24 (0.5)                              |
|                  |                  |               | 3           | 1             | 0.28 (0.6)                              |
| Needleman-Wunsch | 32-39            | 5             | NA          | 0.26 (0.6)    |                                         |
|                  |                  | 4             | NA          | 0.30 (0.6)    |                                         |
|                  |                  | 3             | NA          | 0.35 (0.7)    |                                         |
|                  |                  | 2             | NA          | 0.44 (0.7)    |                                         |
|                  |                  | 1             | NA          | 0.41 (0.7)    |                                         |
| V12              | blastn           | 11            | 5           | 2             | 0.63 (1.9)                              |
|                  |                  |               | 4           | 2             | 0.62 (1.9)                              |
|                  |                  |               | 3           | 2             | 0.64 (1.8)                              |
|                  |                  |               | 2           | 2             | 0.63 (1.7)                              |
|                  |                  |               | 1           | 2             | 0.66 (1.6)                              |
|                  |                  |               | 4           | 1             | 0.50 (1.5)                              |
|                  |                  |               | 3           | 1             | 0.57 (1.5)                              |
|                  |                  |               | 2           | 1             | 0.61 (1.5)                              |
|                  | Gotoh            | 53-55         | 5           | 2             | 0.36 (1.0)                              |
|                  |                  |               | 4           | 2             | 0.37 (1.0)                              |
|                  |                  |               | 3           | 2             | 0.43 (1.0)                              |
|                  |                  |               | 2           | 2             | 0.46 (1.1)                              |
|                  |                  |               | 1           | 2             | 0.56 (1.2)                              |
|                  |                  |               | 4           | 1             | 0.38 (1.0)                              |
|                  |                  |               | 3           | 1             | 0.46 (1.1)                              |
| Needleman-Wunsch | 51-58            | 5             | NA          | 0.43 (1.1)    |                                         |
|                  |                  | 4             | NA          | 0.49 (1.1)    |                                         |
|                  |                  | 3             | NA          | 0.55 (1.2)    |                                         |
|                  |                  | 2             | NA          | 0.66 (1.2)    |                                         |
|                  |                  | 1             | NA          | 0.64 (1.2)    |                                         |
| V2               | blastn           | 10-12         | 5           | 2             | 0.29 (1.3)                              |
|                  |                  |               | 4           | 2             | 0.29 (1.2)                              |
|                  |                  |               | 3           | 2             | 0.29 (1.1)                              |
|                  |                  |               | 2           | 2             | 0.29 (1.0)                              |
|                  |                  |               | 1           | 2             | 0.32 (1.0)                              |
|                  |                  |               | 4           | 1             | 0.25 (0.9)                              |
|                  |                  |               | 3           | 1             | 0.28 (1.0)                              |
|                  |                  |               | 2           | 1             | 0.30 (1.0)                              |
|                  | Gotoh            | 76-77         | 5           | 2             | 0.14 (0.7)                              |
|                  |                  |               | 4           | 2             | 0.15 (0.7)                              |
|                  |                  |               | 3           | 2             | 0.16 (0.7)                              |
|                  |                  |               | 2           | 2             | 0.18 (0.7)                              |
|                  |                  |               | 1           | 2             | 0.22 (0.8)                              |
|                  |                  |               | 4           | 1             | 0.15 (0.7)                              |
|                  |                  |               | 3           | 1             | 0.18 (0.7)                              |

|     |                  |       |   |    |            |
|-----|------------------|-------|---|----|------------|
|     |                  |       | 2 | 1  | 0.21 (0.8) |
|     |                  |       | 1 | 1  | 0.29 (0.8) |
|     | Needleman-Wunsch | 77-82 | 5 | NA | 0.17 (0.7) |
|     |                  |       | 4 | NA | 0.19 (0.7) |
|     |                  |       | 3 | NA | 0.22 (0.8) |
|     |                  |       | 2 | NA | 0.30 (0.8) |
|     |                  |       | 1 | NA | 0.30 (0.9) |
| V23 | blastn           | 10-11 | 5 | 2  | 0.29 (1.0) |
|     |                  |       | 4 | 2  | 0.28 (1.0) |
|     |                  |       | 3 | 2  | 0.28 (0.9) |
|     |                  |       | 2 | 2  | 0.28 (0.9) |
|     |                  |       | 1 | 2  | 0.31 (0.8) |
|     |                  |       | 4 | 1  | 0.23 (0.7) |
|     |                  |       | 3 | 1  | 0.25 (0.7) |
|     |                  |       | 2 | 1  | 0.28 (0.7) |
|     | Gotoh            | 44-47 | 5 | 2  | 0.16 (0.5) |
|     |                  |       | 4 | 2  | 0.16 (0.5) |
|     |                  |       | 3 | 2  | 0.18 (0.5) |
|     |                  |       | 2 | 2  | 0.19 (0.5) |
|     |                  |       | 1 | 2  | 0.24 (0.6) |
|     |                  |       | 4 | 1  | 0.16 (0.5) |
|     |                  |       | 3 | 1  | 0.19 (0.5) |
|     |                  |       | 2 | 1  | 0.22 (0.6) |
|     |                  |       | 1 | 1  | 0.30 (0.6) |
|     | Needleman-Wunsch | 44-50 | 5 | NA | 0.18 (0.6) |
|     |                  |       | 4 | NA | 0.20 (0.6) |
|     |                  |       | 3 | NA | 0.23 (0.6) |
|     |                  |       | 2 | NA | 0.31 (0.7) |
|     |                  |       | 1 | NA | 0.28 (0.7) |
| V3  | blastn           | 10-12 | 5 | 2  | 0.21 (1.3) |
|     |                  |       | 4 | 2  | 0.21 (1.3) |
|     |                  |       | 3 | 2  | 0.22 (1.3) |
|     |                  |       | 2 | 2  | 0.21 (1.2) |
|     |                  |       | 1 | 2  | 0.24 (1.2) |
|     |                  |       | 4 | 1  | 0.16 (1.0) |
|     |                  |       | 3 | 1  | 0.17 (0.9) |
|     |                  |       | 2 | 1  | 0.19 (0.9) |
|     | Gotoh            | 67-68 | 5 | 2  | 0.11 (0.5) |
|     |                  |       | 4 | 2  | 0.11 (0.5) |
|     |                  |       | 3 | 2  | 0.13 (0.6) |
|     |                  |       | 2 | 2  | 0.13 (0.6) |
|     |                  |       | 1 | 2  | 0.17 (0.5) |
|     |                  |       | 4 | 1  | 0.12 (0.6) |
|     |                  |       | 3 | 1  | 0.13 (0.6) |
|     |                  |       | 2 | 1  | 0.16 (0.6) |
|     |                  |       | 1 | 1  | 0.21 (0.7) |
|     | Needleman-Wunsch | 66-69 | 5 | NA | 0.12 (0.6) |
|     |                  |       | 4 | NA | 0.13 (0.6) |
|     |                  |       | 3 | NA | 0.16 (0.6) |
|     |                  |       | 2 | NA | 0.21 (0.7) |
|     |                  |       | 1 | NA | 0.17 (0.7) |
| V4  | blastn           | 10-11 | 5 | 2  | 0.10 (0.5) |
|     |                  |       | 4 | 2  | 0.10 (0.5) |
|     |                  |       | 3 | 2  | 0.10 (0.5) |
|     |                  |       | 2 | 2  | 0.10 (0.5) |
|     |                  |       | 1 | 2  | 0.11 (0.5) |
|     |                  |       | 4 | 1  | 0.09 (0.5) |
|     |                  |       | 3 | 1  | 0.10 (0.5) |
|     |                  |       | 2 | 1  | 0.11 (0.5) |
|     | Gotoh            | 85-88 | 5 | 2  | 0.04 (0.3) |
|     |                  |       | 4 | 2  | 0.04 (0.3) |
|     |                  |       | 3 | 2  | 0.05 (0.3) |
|     |                  |       | 2 | 2  | 0.05 (0.3) |
|     |                  |       | 1 | 2  | 0.07 (0.3) |
|     |                  |       | 4 | 1  | 0.04 (0.3) |
|     |                  |       | 3 | 1  | 0.05 (0.3) |

|     |                  |         |   |    |            |
|-----|------------------|---------|---|----|------------|
|     |                  |         | 2 | 1  | 0.06 (0.3) |
|     |                  |         | 1 | 1  | 0.12 (0.4) |
|     | Needleman-Wunsch | 90-93   | 5 | NA | 0.05 (0.3) |
|     |                  |         | 4 | NA | 0.05 (0.3) |
|     |                  |         | 3 | NA | 0.07 (0.3) |
|     |                  |         | 2 | NA | 0.12 (0.4) |
|     |                  |         | 1 | NA | 0.10 (0.4) |
| V6  | blastn           | 10-12   | 5 | 2  | 1.50 (14)  |
|     |                  |         | 4 | 2  | 1.50 (13)  |
|     |                  |         | 3 | 2  | 1.46 (13)  |
|     |                  |         | 2 | 2  | 1.45 (13)  |
|     |                  |         | 1 | 2  | 1.45 (13)  |
|     |                  |         | 4 | 1  | 1.48 (13)  |
|     |                  |         | 3 | 1  | 1.45 (13)  |
|     |                  |         | 2 | 1  | 1.46 (13)  |
|     | Gotoh            | 125-131 | 5 | 2  | 0.31 (1.8) |
|     |                  |         | 4 | 2  | 0.34 (1.8) |
|     |                  |         | 3 | 2  | 0.40 (1.7) |
|     |                  |         | 2 | 2  | 0.43 (1.7) |
|     |                  |         | 1 | 2  | 0.48 (1.7) |
|     |                  |         | 4 | 1  | 0.36 (1.7) |
|     |                  |         | 3 | 1  | 0.43 (1.7) |
|     |                  |         | 2 | 1  | 0.47 (1.7) |
|     |                  |         | 1 | 1  | 0.61 (1.9) |
|     | Needleman-Wunsch | 128-132 | 5 | NA | 0.39 (1.8) |
|     |                  |         | 4 | NA | 0.43 (1.7) |
|     |                  |         | 3 | NA | 0.48 (1.7) |
|     |                  |         | 2 | NA | 0.60 (1.9) |
|     |                  |         | 1 | NA | 0.64 (1.9) |
| V89 | blastn           | 10-11   | 5 | 2  | 0.24 (1.0) |
|     |                  |         | 4 | 2  | 0.24 (1.0) |
|     |                  |         | 3 | 2  | 0.25 (0.9) |
|     |                  |         | 2 | 2  | 0.25 (0.9) |
|     |                  |         | 1 | 2  | 0.25 (0.9) |
|     |                  |         | 4 | 1  | 0.22 (0.9) |
|     |                  |         | 3 | 1  | 0.23 (0.9) |
|     |                  |         | 2 | 1  | 0.23 (0.8) |
|     | Gotoh            | 51-52   | 5 | 2  | 0.15 (0.6) |
|     |                  |         | 4 | 2  | 0.15 (0.6) |
|     |                  |         | 3 | 2  | 0.17 (0.6) |
|     |                  |         | 2 | 2  | 0.17 (0.6) |
|     |                  |         | 1 | 2  | 0.19 (0.6) |
|     |                  |         | 4 | 1  | 0.15 (0.6) |
|     |                  |         | 3 | 1  | 0.17 (0.6) |
|     |                  |         | 2 | 1  | 0.18 (0.6) |
|     |                  |         | 1 | 1  | 0.21 (0.6) |
|     | Needleman-Wunsch | 53-56   | 5 | NA | 0.17 (0.6) |
|     |                  |         | 4 | NA | 0.18 (0.6) |
|     |                  |         | 3 | NA | 0.19 (0.6) |
|     |                  |         | 2 | NA | 0.22 (0.7) |
|     |                  |         | 1 | NA | 0.19 (0.6) |
| V9  | blastn           | 9-10    | 5 | 2  | 0.26 (1.5) |
|     |                  |         | 4 | 2  | 0.26 (1.5) |
|     |                  |         | 3 | 2  | 0.27 (1.5) |
|     |                  |         | 2 | 2  | 0.26 (1.4) |
|     |                  |         | 1 | 2  | 0.26 (1.4) |
|     |                  |         | 4 | 1  | 0.23 (1.4) |
|     |                  |         | 3 | 1  | 0.24 (1.3) |
|     |                  |         | 2 | 1  | 0.24 (1.3) |
|     | Gotoh            | 78-79   | 5 | 2  | 0.13 (0.8) |
|     |                  |         | 4 | 2  | 0.13 (0.8) |
|     |                  |         | 3 | 2  | 0.15 (0.8) |
|     |                  |         | 2 | 2  | 0.16 (0.8) |
|     |                  |         | 1 | 2  | 0.18 (0.8) |
|     |                  |         | 4 | 1  | 0.14 (0.8) |
|     |                  |         | 3 | 1  | 0.16 (0.8) |

|  |                  |       |   |    |            |
|--|------------------|-------|---|----|------------|
|  |                  |       | 2 | 1  | 0.16 (0.8) |
|  |                  |       | 1 | 1  | 0.18 (0.8) |
|  | Needleman-Wunsch | 80-82 | 5 | NA | 0.15 (0.8) |
|  |                  |       | 4 | NA | 0.17 (0.8) |
|  |                  |       | 3 | NA | 0.17 (0.8) |
|  |                  |       | 2 | NA | 0.19 (0.9) |
|  |                  |       | 1 | NA | 0.17 (0.8) |

- a The average percentage difference in similarity between the template sequence and the SILVA aligned candidate sequence and the difference in similarity between the template sequence and the candidate sequence aligned by the different implementations. Positive values indicate the candidate alignment is more similar to the template sequence and negative values are less similar. Values in parentheses indicate the standard deviation.
